# Supplementary material for: AML associated oncofusion proteins PML-RARA, AML1-ETO and CBFB-MYH11 target RUNX/ETS-factor binding sites to modulate H3ac levels and drive leukemogenesis
Source: PubMed Central journal article supplement (PMC5355061; doi:10.18632/oncotarget.14150), 2016-12-24
Supplement: oncotarget-08-12855-s001.pdf [file oncotarget-08-12855-s001.pdf]

## AML associated oncofusion proteins PML-RARA, AML1-ETO and CBFB-MYH11 target RUNX/ETS-factor binding sites to modulate H3ac levels and drive leukemogenesis

### SUPPLEMENTARY FIGURE AND TABLE

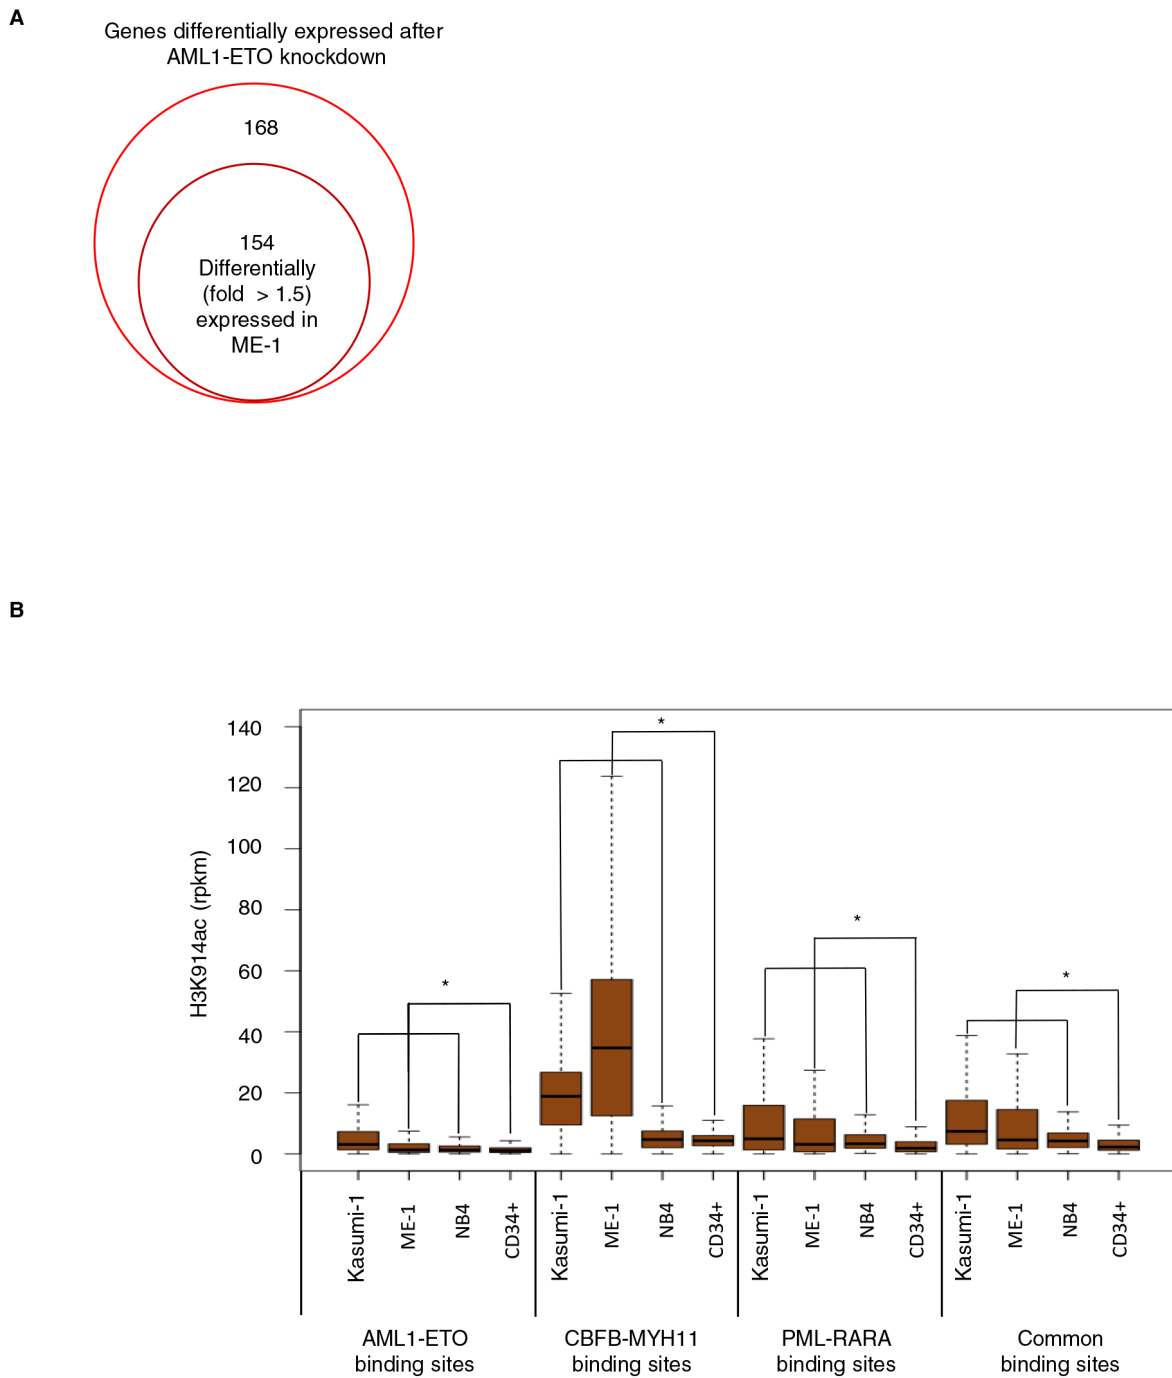

**Supplementary Figure 1: A.** Venn diagram showing that 154 out of 322 genes differentially expressed after AML1-ETO knockdown in Kasumi-1 cells are also differentially expressed in ME-1 cells upon CBFB-MYH11 knockdown. **B.** Oncofusion binding sites significantly differ in acetylation levels (\*p-value < 0.01) between leukemic cells and normal CD34+ cells.

**Supplementary Table 1: Expression levels of the gene set identified after AML1-ETO knockdown in Kasumi-1 cells [5] before and after knockdown of CBFβ-MYH11 in ME-1 cells**

**See Supplementary File 1**
